# Supplementary material
Source: PubMed Central journal article supplement (PMC2905786)
Supplement: NIHMS218848-supplement-01.pdf [file NIHMS218848-supplement-01.pdf]

ecules by thin-layer chromatography. *Proc Natl Acad Sci USA* **94**: 6036–6041.

Smith, K.M., Bu, Y., and Suga, H. (2003) Library screening for synthetic agonists and antagonists of a *Pseudomonas aeruginosa* autoinducer. *Chem Biol* **10**: 563–571.

Swofford, D. (2000) *PAUP\*. Phylogenetic Analysis Using Parsimony (\*and Other Methods)*. Sunderland, MA, USA: Sinauer Associates.

Urbanowski, M.L., Lostroh, C.P., and Greenberg, E.P. (2004) Reversible acyl-homoserine lactone binding to purified *Vibrio fischeri* LuxR protein. *J Bacteriol* **186**: 631–637.

Wang, C., Meek, D.J., Panchal, P., Boruvka, N., Archibald, F.S., Driscoll, B.T., and Charles, T.C. (2006) Isolation of poly-3-hydroxybutyrate metabolite genes from complex microbial communities by phenotypic complementation of bacterial mutants. *Appl Environ Microbiol* **72**: 384–391.

Waters, C.M., and Bassler, B.L. (2005) Quorum sensing: cell-to-cell communication in bacteria. *Annu Rev Cell Dev Biol* **21**: 319–346.

Weingart, C.L., White, C.E., Liu, S., Chai, Y., Cho, H., Tsai, C.S., et al. (2005) Direct binding of the quorum sensing regulator CepR of *Burkholderia cenocepacia* to two target promoters *in vitro*. *Mol Microbiol* **57**: 452–467.

Whitehead, N.A., Barnard, A.M., Slater, H., Simpson, N.J., and Salmond, G.P. (2001) Quorum-sensing in Gram-negative bacteria. *FEMS Microbiol Rev* **25**: 365–404.

Williams, P. (2007) Quorum sensing, communication and cross-kingdom signalling in the bacterial world. *Microbiology* **153**: 3923–3938.

Williamson, L.L., Borlee, B.R., Schloss, P.D., Guan, C., Allen, H.K., and Handelsman, J. (2005) Intracellular screen to identify metagenomic clones that induce or inhibit a quorum-sensing biosensor. *Appl Environ Microbiol* **71**: 6335–6344.

Xavier, K.B., and Bassler, B.L. (2005) Interference with AI-2-mediated bacterial cell-cell communication. *Nature* **437**: 750–753.

Yates, E.A., Philipp, B., Buckley, C., Atkinson, S., Chhabra, S.R., Sockett, R.E., et al. (2002) N-acylhomoserine lactones undergo lactonolysis in a pH-, temperature-, and acyl chain length-dependent manner during growth of *Yersinia pseudotuberculosis* and *Pseudomonas aeruginosa*. *Infect Immun* **70**: 5635–5646.

Zheng, H., Zhong, Z., Lai, X., Chen, W.X., Li, S., and Zhu, J. (2006) A LuxR/LuxI-type quorum-sensing system in a plant bacterium, *Mesorhizobium tianshanense*, controls symbiotic nodulation. *J Bacteriol* **188**: 1943–1949.

Zhu, J., and Winans, S.C. (2001) The quorum-sensing transcriptional regulator TraR requires its cognate signaling ligand for protein folding, protease resistance, and dimerization. *Proc Natl Acad Sci USA* **98**: 1507–1512.

## Supporting information

Additional Supporting Information may be found in the online version of this article:

**Fig. S1.** Phylogenetic analysis of sequences of QS6-1.

A. Midpoint rooted ML tree of homologue sequences of QS6-1-1, transglutaminase-like enzyme.

B. Midpoint rooted ML tree of homologues of QS6-1-7, hypothetical protein.

C. Midpoint rooted ML tree of homologues of QS6-1-4, hypothetical protein.

Tree topologies were determined using phylml version 2.4.4. Numbers at the nodes are bootstrap values obtained from 1000 replicates using PAUP (Version 4.0b) under neighbour-joining algorithm (heuristic search). A., *Alteromonadales*; B., *Burkholderia*; Br., *Bradyrhizobium*; Ca., *Campylobacter*; Ce., *Cellulophaga*; F., *Flavobacterium*; G., *Gramella*; H., *Hahella*; Hs., *Halorhodospira*; M., *Mesorhizobium*; Mc., *Methylococcus*; Ms., *Magnetospirillum*; P., *Polaribacter*; Pc., *Prosthecochloris*; Pf., *Psychroflexus*; S., *Shewanella*; X., *Xanthomonas*; V., *Vibrio*.

**Fig. S2.** Midpoint rooted ML tree of homologues of QS10-1-2, Mg-chelatase related protein. Tree topology was determined using phylml version 2.4.4. Bootstrap values were obtained from using PAUP (Version 4.0b) under neighbour-joining algorithm ('Fast' stepwise-addition). Ac., *Acidovorax*; Ae, *Aeromonas*; B., *Burkholderia*; C., *Comamonas*; Cb., *Chromobacterium*; Ch., *Chromohalobacter*; Co., *Coxiella*; D., *Delftia*; Dc, *Dechloromonas*; F., *Francisella*; H., *Hermiimonas*; J., *Janthinobacterium*; L., *Leptothrix*; Mb., *Methylobacillus*; Mc., *Methylococcus*; Nc., *Nitrococcus*; Ne., *Neisseria*; Ns., *Nitrosomonas*; Nsc, *Nitrosococcus*; P., *Polaromonas*; R., *Ralstonia*; Rf., *Rhodofera*; T., *Thiobacillus*; V., *Verminephrobacter*; X, *Xanthomonas*.

**Fig. S3.** ML tree of homologues of QS10-2-1, Zinc containing alcohol dehydrogenase protein. Tree topology was determined using phylml version 2.4.4. Bootstrap values were obtained using PAUP (Version 4.0b) under neighbour-joining algorithm (full heuristic). A., *Acidovorax*; Ag., *Agrobacterium*; Ar., *Azorhizobium*; B., *Burkholderia*; Bt, *Bordetella*; Co., *Comamonas*; Cu., *Cupriavidus*; D., *Delftia*; G., *Granulibacter*; H., *Hermiimonas*; Ho., *Hoeflea*; J., *Janthinobacterium*; Jb., *Janibacter*; Mb., *Methylibium*; Mr, *Mesorhizobium*; Ns., *Nitrosospira*; O., *Oceanicola*; Pa., *Parvibaculum*; Pn., *Polynucleobacter*; Po., *Polaromonas*; R., *Rhizobium*; Rb., *Roseobacter*; Rf., *Rhodofera*; Rhb., *Rhodobacterales*; Rhs., *Rhodospirillum*; Rt., *Ralstonia*; S., *Serratia*; Sb., *Solibacter*; T., *Thermobifida*; V., *Verminephrobacter*; X., *Xanthobacter*; Y., *Yersinia*.

**Fig. S4.** A, ML tree of homologues of QS10-2-4, phytonyl-CoA dioxygenase related protein. B, ML tree of homologues of QS10-2-5, putative GntR family transcriptional regulator. Tree topologies were determined using phylml version 2.4.4. Bootstrap values were obtained using PAUP (Version 4.0b) under neighbour-joining algorithm (full heuristic). B., *Burkholderia*; Bj., *Beijerinckia*; Bo, *Bordetella*; Br, *Bradyrhizobium*; E., *Erythrobacter*; M., *Mesorhizobium*; Mb., *Mycobacterium*; MGP, *marine gamma proteobacterium*; O., *Oceaniculis*; Pb., *Parvibaculum*; Ps., *Pseudomonas*; Pa., *Pseudoalteromonas*; R., *Ralstonia*; Rh, *Rhizobium*; Rv., *Roseovarius*; Sm., *Sphingomonas*; Sp., *Sphingopyxis*; St., *Streptomyces*; T., *Thermotoga*; V., *Verminephrobacter*.

**Fig. S5.** Midpoint rooted maximum likelihood trees of LuxI (A) and LuxR (B) homologues. Same as Fig. 4 except accession numbers for the sequences were supplied.

**Fig. S6.** ESI MS and MS/MS results of the standard 3-O-C12 HSL (Cayman chemical) and the active compounds produced by LuxI<sub>QS10-1</sub> (at spot I and K in Fig. 6).

A. MS (left) and MS/MS (right) of synthetic 3-O-C12 HSL.

B. MS (left) and MS/MS (right) of the active compounds at spot I. The fragmentation pattern is the same as synthetic 3-O-C12 HSL except there is an extra peak at  $m/z$  175, which is most probably from host contamination.

C. MS (left) and MS/MS (right) of control for spot I, which is extracted from the same position of a TLC plate loaded with extracts from an *E. coli* BL21(DE3) cell culture. The MS/MS for the ion at  $m/z$  199 showed a major fragmentation peak at  $m/z$  175, which confirms that the peak 175 in lane b is a contaminant from the host cells.

D. MS (left) and MS/MS (right) of the active compounds at spot K.

**Fig. S7.** ESI MS and MS/MS results of the standard C8-HSL and the AHLs produced by LuxI<sub>QS10-2</sub> (at spot M and N in Fig. 6).

A. MS (left) and MS/MS (right) of synthetic C8 HSL.

B. MS (left) and MS/MS (right) of the compounds at spot M.

C. MS (left) and MS/MS (right) of the compounds at spot N.

**Table S1.** Bacterial strains and plasmids used in this study.

**Table S2.** Primers used to amplify *luxI* and *luxR* homologues.

Please note: Wiley-Blackwell are not responsible for the content or functionality of any supporting materials supplied by the authors. Any queries (other than missing material) should be directed to the corresponding author for the article.

## Supporting Information

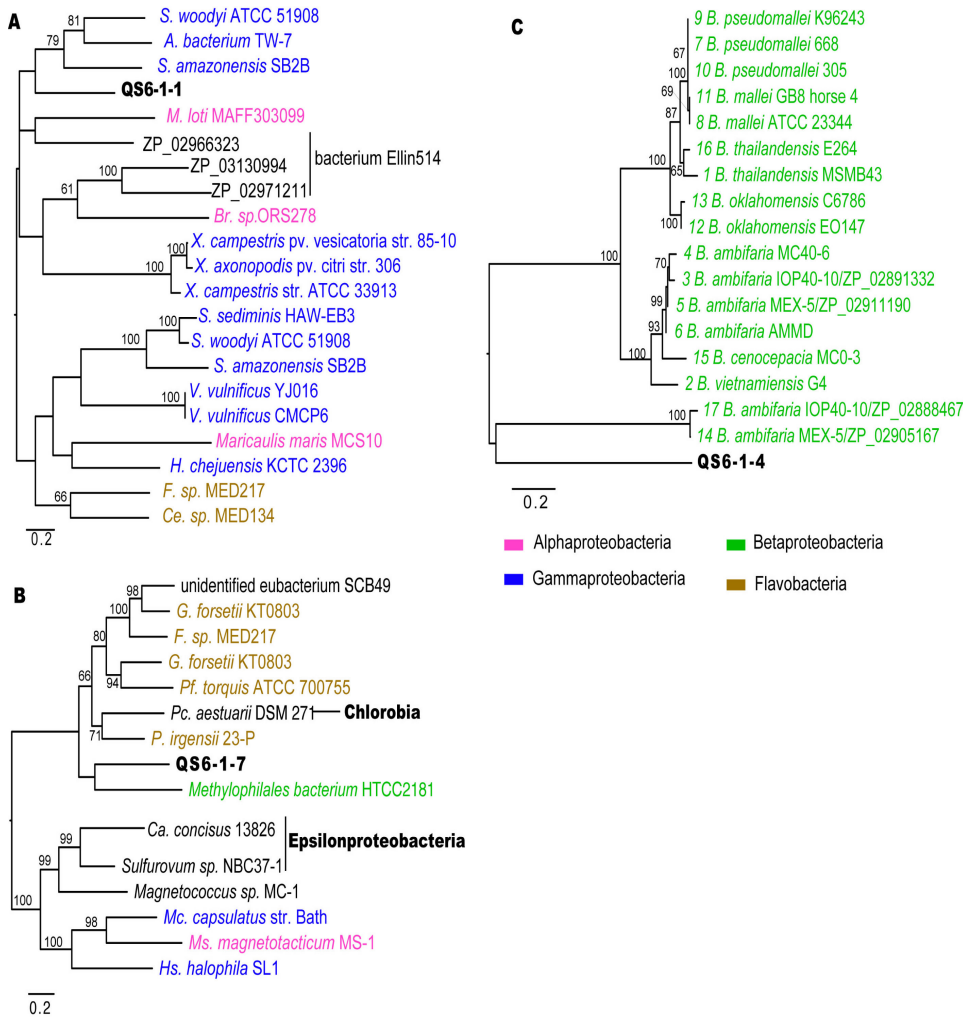

Fig S1. Phylogenetic analysis of sequences of QS6-1.

A, Midpoint rooted ML tree of homolog sequences of QS6-1-1, transglutaminase-like enzyme; B, Midpoint rooted ML tree of homologs of QS6-1-7, hypothetical protein; C, Midpoint rooted ML tree of homologs of QS6-1-4, hypothetical protein. Tree topologies were determined using phylml version 2.4.4. Numbers at the nodes are bootstrap values obtained from 1000 replicates using PAUP (Version 4.0 b) under neighbour joining algorithm (heuristic search). Abbreviations used: *A.*, *Alteromonadales*; *B.*, *Burkholderia*; *Br.*, *Bradyrhizobium*; *Ca.*, *Campylobacter*; *Ce.*, *Cellulophaga*; *F.*, *Flavobacterium*; *G.*, *Gramella*; *H.*, *Hahella*; *Hs.*, *Halorhodospira*; *M.*, *Mesorhizobium*; *Mc.*, *Methylococcus*; *Ms.*, *Magnetospirillum*; *P.*, *Polaribacter*; *Pc.*, *Prosthecochloris*; *Pf.*, *Psychroflexus*; *S.*, *Shewanella*; *X.*, *Xanthomonas*; *V.*, *Vibrio*.

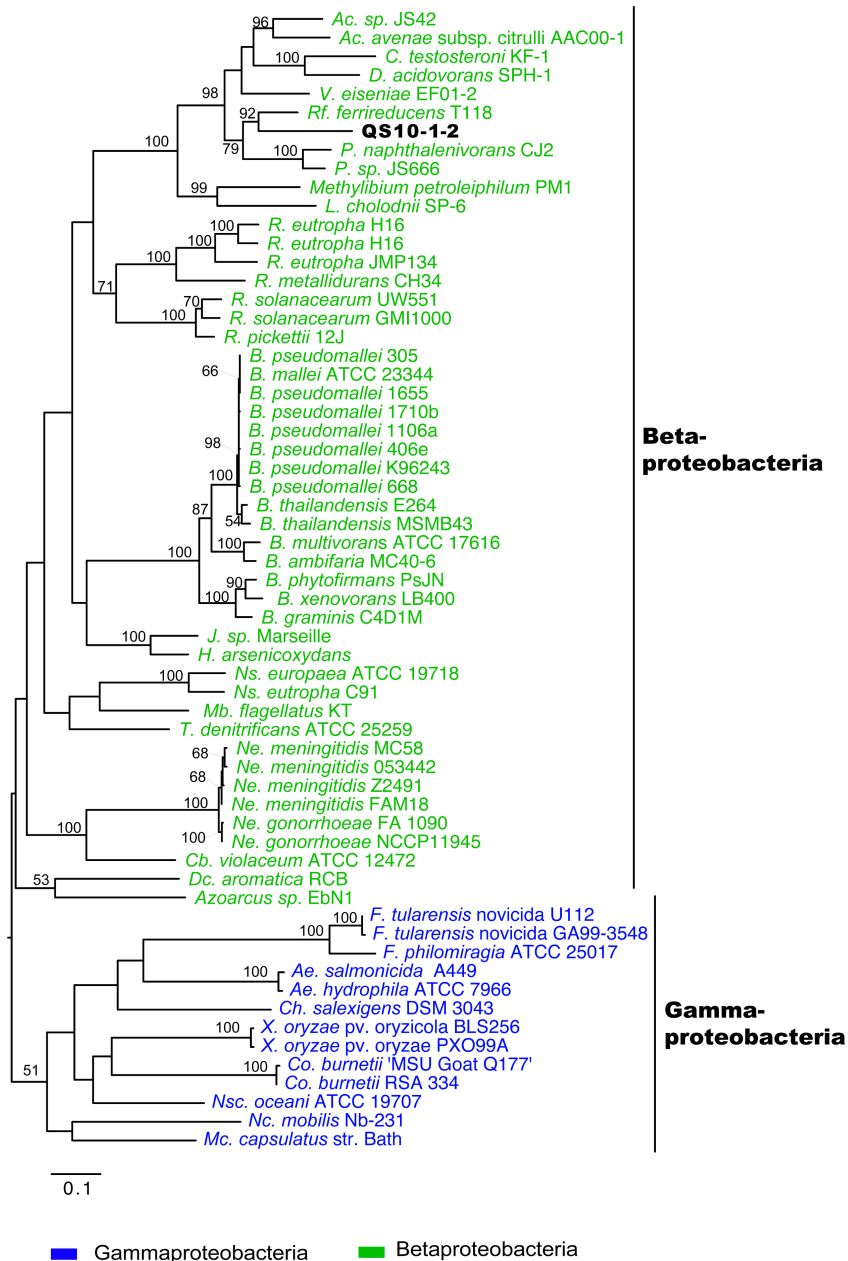

Fig S2

Midpoint rooted ML tree of homologs of QS10-1-2, Mg-chelatase related protein. Tree topology was determined using phyml version 2.4.4. Bootstrap values were obtained from using PAUP (Version 4.0 b) under neighbour joining algorithm ("Fast" stepwise-addition). Abbreviations: *Ac.*, *Acidovorax*; *Ae.*, *Aeromonas*; *B.*, *Burkholderia*; *C.*, *Comamonas*; *Cb.*, *Chromobacterium*; *Ch.*, *Chromohalobacter*; *Co.*, *Coxiella*; *D.*, *Delftia*; *Dc.*, *Dechloromonas*; *F.*, *Francisella*; *H.*, *Herminiimonas*; *J.*, *Janthinobacterium*; *L.*, *Leptothrix*; *Mb.*, *Methylobacillus*; *Mc.*, *Methylococcus*; *Nc.*, *Nitrococcus*; *Ne.*, *Neisseria*; *Ns.*, *Nitrosomonas*; *Nsc.*, *Nitrosococcus*; *P.*, *Polaromonas*; *R.*, *Ralstonia*; *Rf.*, *Rhodofera*; *T.*, *Thiobacillus*; *V.*, *Verminephrobacter*; *X.*, *Xanthomonas*.

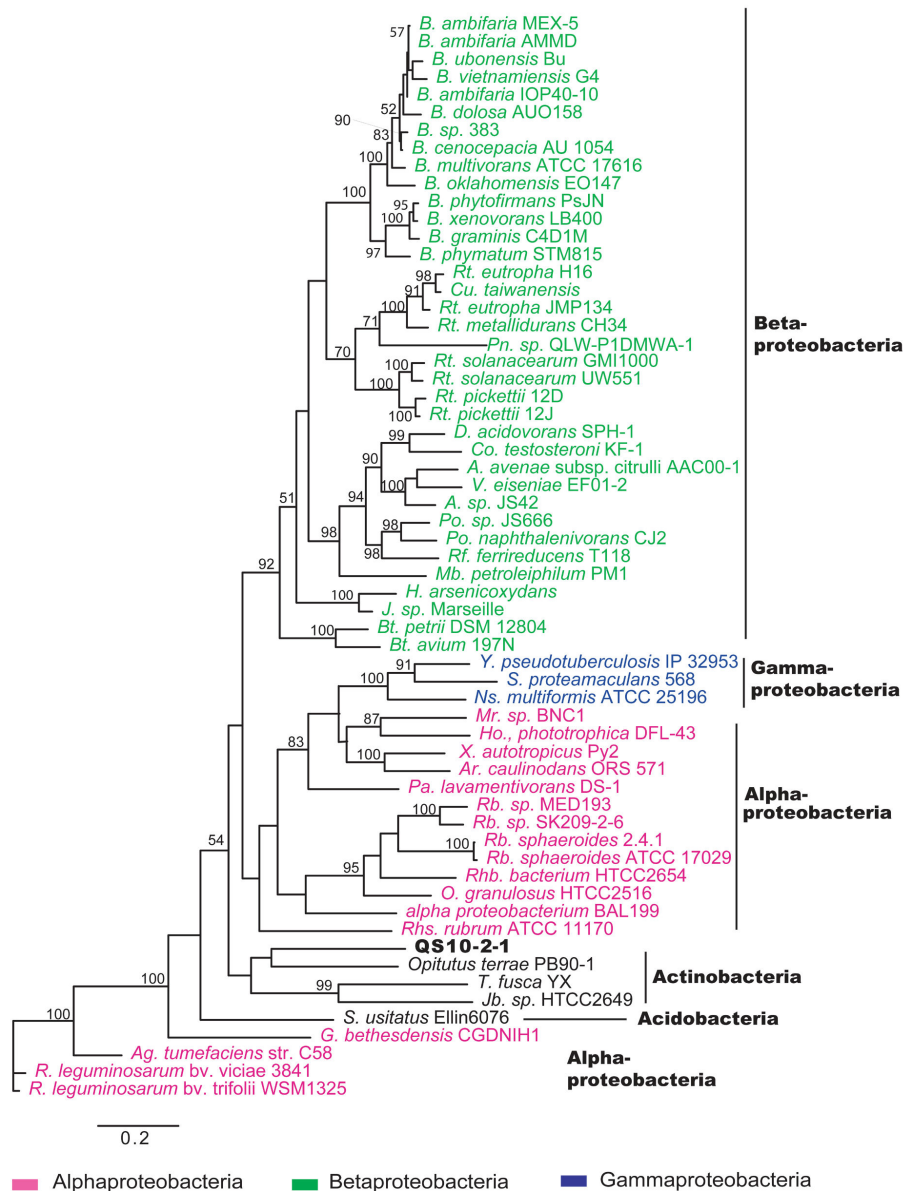

Fig S3

ML tree of homologs of QS10-2-1, Zinc containing alcohol dehydrogenase protein. Tree topology was determined using phylml version 2.4.4. Bootstrap values were obtained using PAUP (Version 4.0 b) under neighbour joining algorithm (full heuristic).

Abbreviations: *A.*, *Acidovorax*; *Ag.*, *Agrobacterium*; *Ar.*, *Azorhizobium*; *B.*, *Burkholderia*; *Bt.* *Bordetella*; *Co.*, *Comamonas*; *Cu.*, *Cupriavidus*; *D.*, *Delftia*; *G.*, *Granulibacter*; *H.*, *Herminiimonas*; *Ho.*, *Hoeflea*; *J.*, *Janthinobacterium*; *Jb.*, *Janibacter*; *Mb.*, *Methylibium*; *Mr.*, *Mesorhizobium*; *Ns.*, *Nitrosospora*; *O.*, *Oceanicola*; *Pa.*, *Parvibaculum*; *Pn.*, *Polynucleobacter*; *Po.*, *Polaromonas*; *R.*, *Rhizobium*; *Rb.*, *Roseobacter*; *Rf.*, *Rhodoferrax*; *Rhb.*, *Rhodobacterales*; *Rhs.*, *Rhodospirillum*; *Rt.*, *Ralstonia*; *S.*, *Serratia*; *Sb.*, *Solibacter*; *T.*, *Thermobifida*; *V.*, *Verminephrobacter*; *X.*, *Xanthobacter*; *Y.*, *Yersinia*.

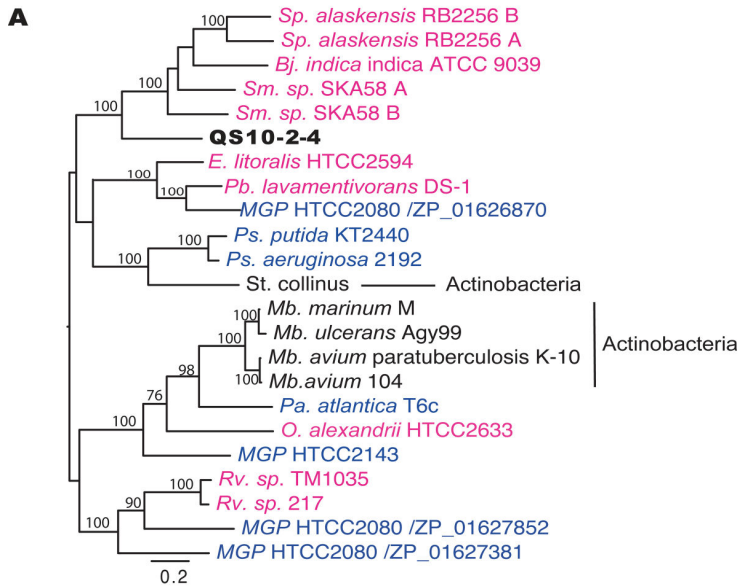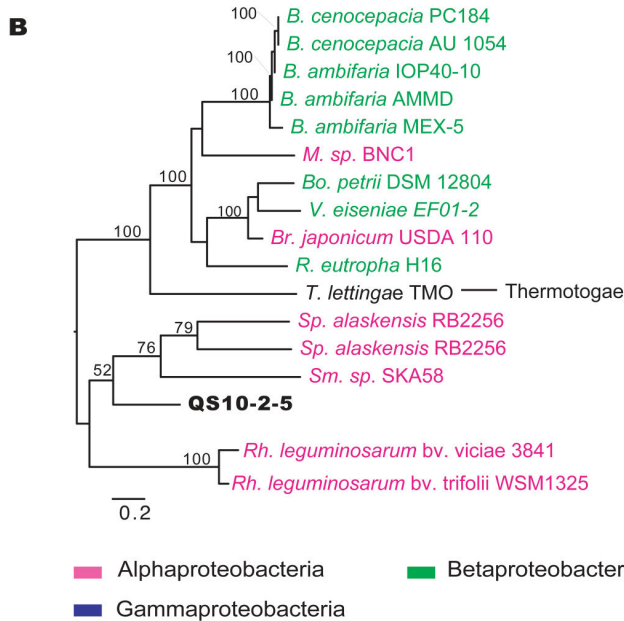

Fig S4

A, ML tree of homologs of QS10-2-4, phytonyl-CoA dioxygenase related protein.

B, ML tree of homologs of QS10-2-5, putative GntR family transcriptional regulator.

Tree topologies were determined using phylml version 2.4.4. Bootstrap values were obtained using PAUP (Version 4.0 b) under neighbour joining algorithm (full heuristic). Abbreviations: *B.*, *Burkholderia*; *Bj.*, *Beijerinckia*; *Bo.*, *Bordetella*; *Br.* *Bradyrhizobium*; *E.*, *Erythrobacter*; *M.*, *Mesorhizobium*; *Mb.*, *Mycobacterium*; *MGP*, marine gamma proteobacterium; *O.*, *Oceanicaulis*; *Pb.*, *Parvibaculum*; *Ps.*, *Pseudomonas*; *Pa.*, *Pseudoalteromonas*; *R.*, *Ralstonia*; *Rh.* *Rhizobium*; *Rv.*, *Roseovarius*; *Sm.*, *Sphingomonas*; *Sp.*, *Sphingopyxis*; *St.*, *Streptomyces*; *T.*, *Thermotoga*; *V.*, *Verminephrobacter*.

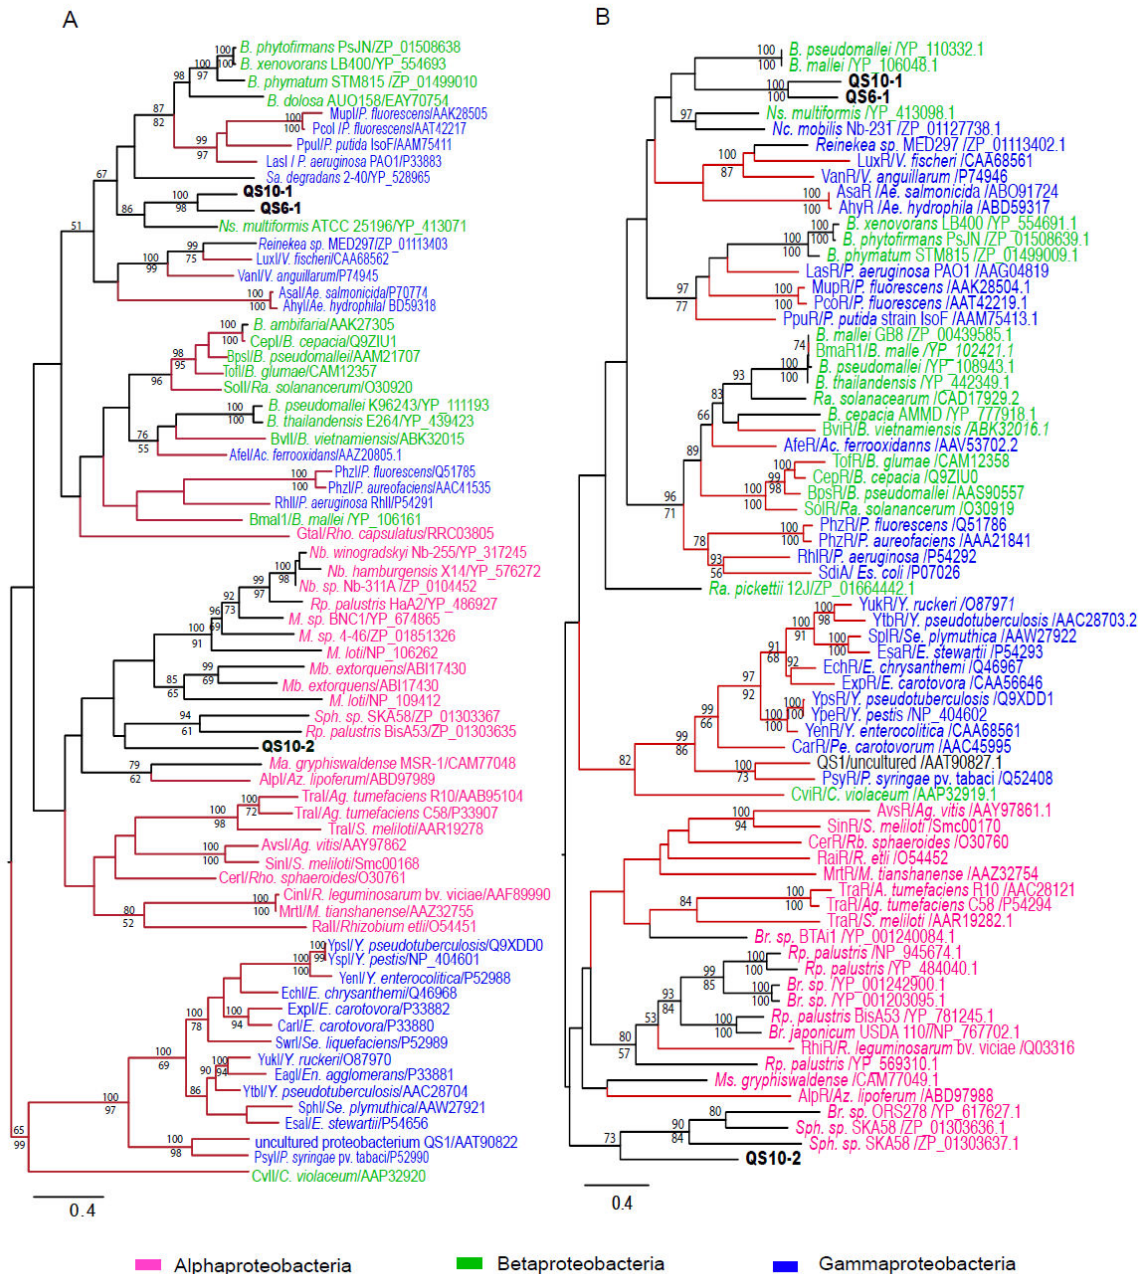

Fig S5, Midpoint rooted maximum likelihood trees of LuxI (A) and LuxR (B) homologs. Same as Fig4 except accession numbers for the sequences were supplied.

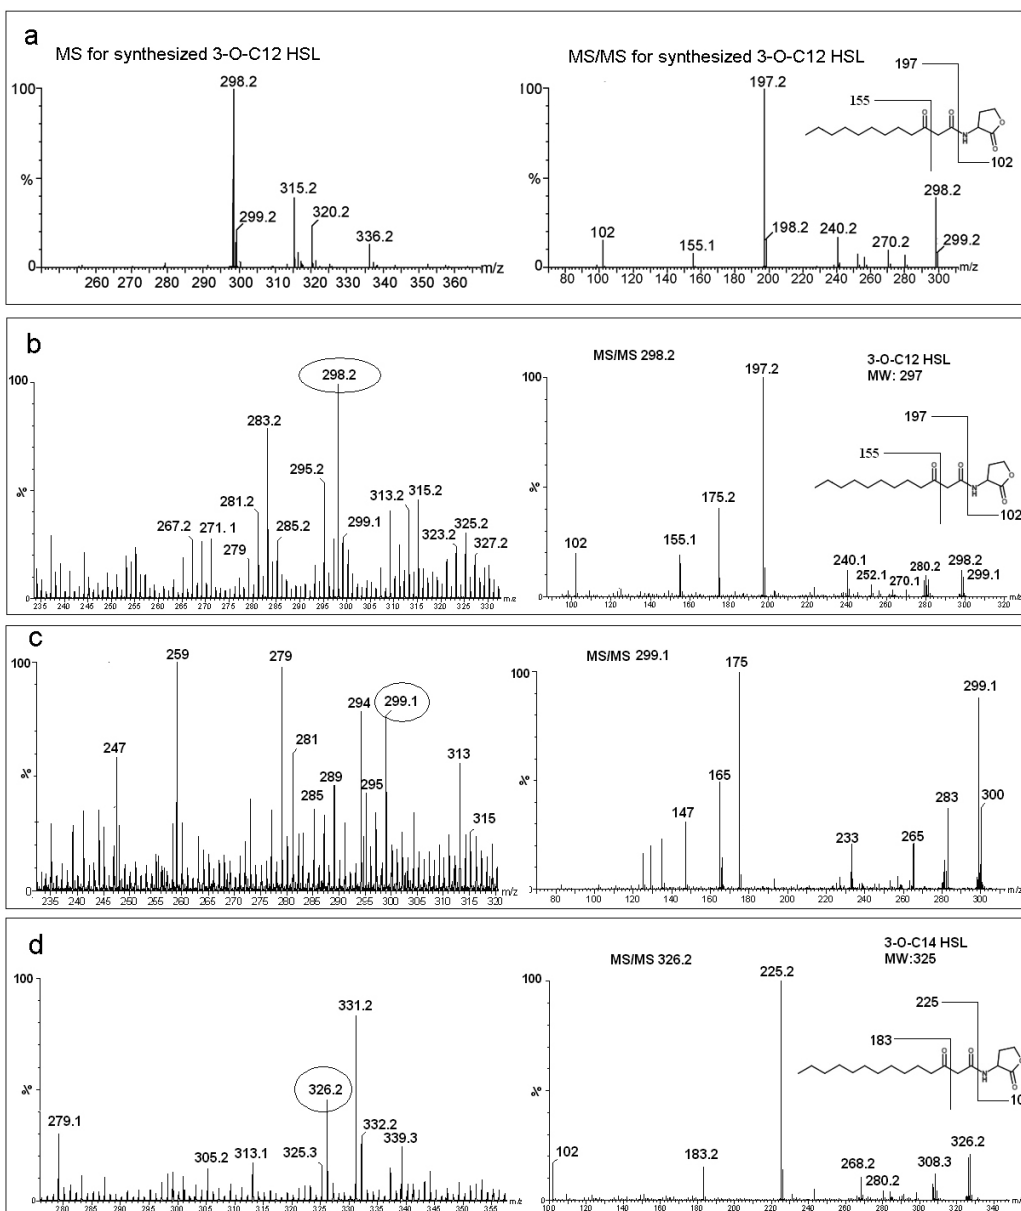

Fig S6. ESI MS and MS/MS results of the standard 3-O-C12 HSL (Cayman chemical) and the active compounds produced by LuxIQS10-1 (at spot I and K in Fig 6).

a, MS (left) and MS/MS (right) of synthetic 3-O-C12 HSL.

b, MS (left) and MS/MS (right) of the active compounds at spot I. The fragmentation pattern is the same as synthetic 3-O-C12 HSL except there is an extra peak at  $m/z$  175, which is most probably from host contamination.

c, MS (left) and MS/MS (right) of control for spot I, which is extracted from the same position of a TLC plate loaded with extracts from an *E. coli* BL21(DE3) cell culture. The MS/MS for the ion at  $m/z$  199 showed a major fragmentation peak at  $m/z$  175, which confirms that the peak 175 in lane b is a contaminant from the host cells.

d, MS (left) and MS/MS (right) of the active compounds at spot K.



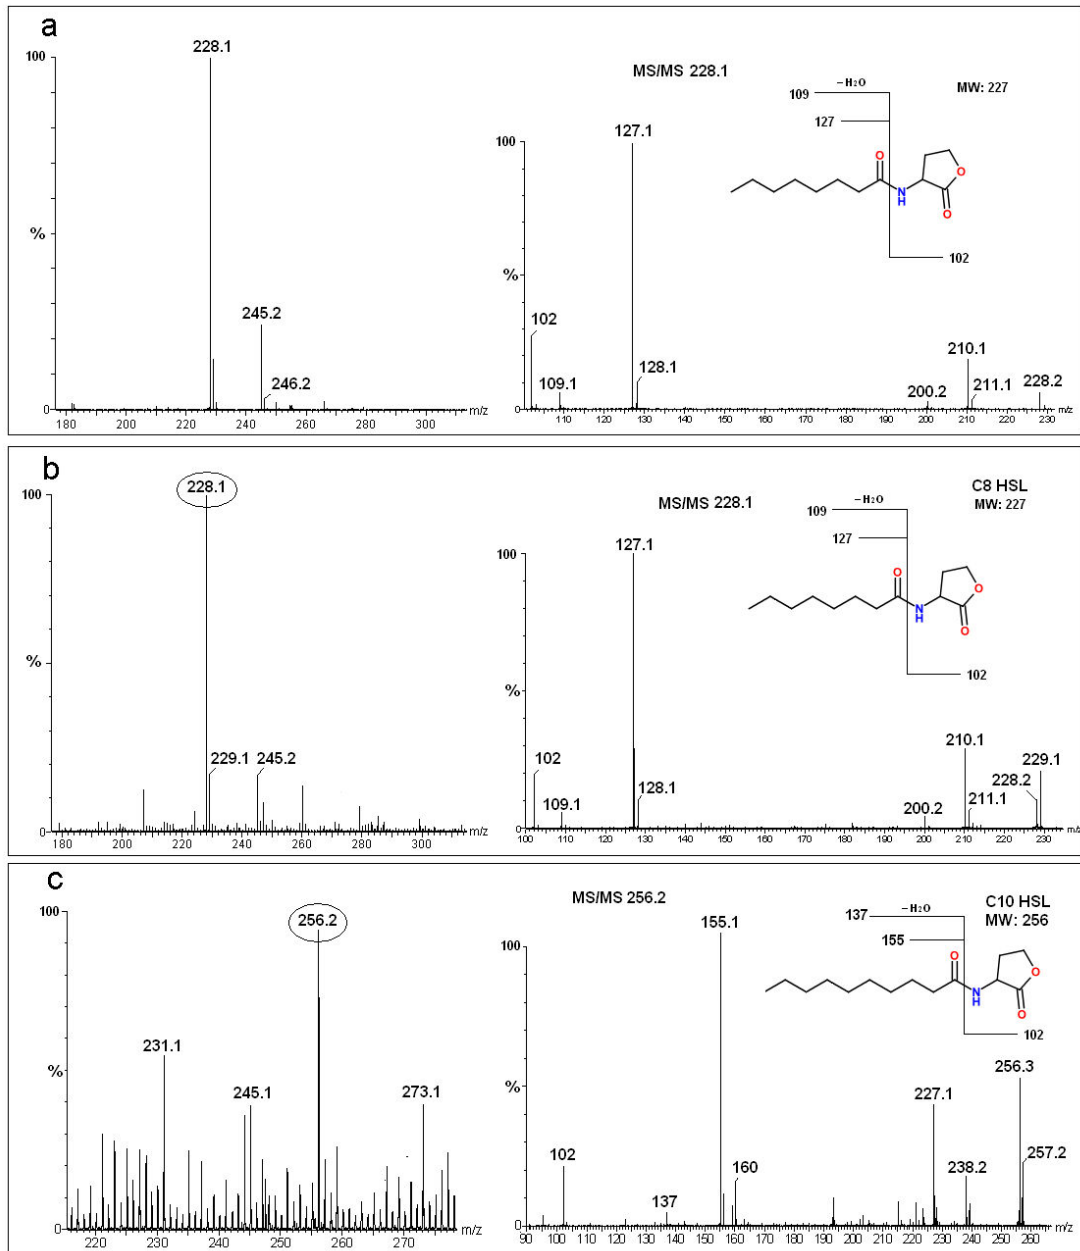

Fig S7. ESI MS and MS/MS results of the standard C8-HSL and the AHLs produced by LuxIQS10-2 (at spot M and N in Fig 6). a, MS (left) and MS/MS (right) of synthetic C8 HSL; b, MS (left) and MS/MS (right) of the compounds at spot M; c, MS (left) and MS/MS (right) of the compounds at spot N.

**Table legends**

Table S1. Bacterial strains and plasmids used in this study.

| Strains or plasmids              | Relevant characteristics                                                                                                                                                                                 | Reference or source                                       |
|----------------------------------|----------------------------------------------------------------------------------------------------------------------------------------------------------------------------------------------------------|-----------------------------------------------------------|
| <b>Strains</b>                   |                                                                                                                                                                                                          |                                                           |
| <b>Agrobacterium tumefaciens</b> |                                                                                                                                                                                                          |                                                           |
| HC103(pJZ381)                    | HC103 is R10 based strain, the Ti plasmid contains a traC-lacZ translational fusion and a traI nopolar deletion. In pJZ381, traR is under lac promoter of pBBR1MCS5. Km <sup>r</sup> and Gm <sup>r</sup> | This study                                                |
| C58                              | Wild type strain                                                                                                                                                                                         | (Goodner et al., 2001), (Wood et al., 2001)               |
| <b>Escherichia Coli</b>          |                                                                                                                                                                                                          |                                                           |
| DH5 $\alpha$                     | recA1 and endA1 cloning strain                                                                                                                                                                           | Lab stock                                                 |
| DH5 $\alpha$ (pRK600)            | DH5 $\alpha$ strain containing helper plasmid pRK600, Cm <sup>r</sup>                                                                                                                                    | (Finan et al., 1986)                                      |
| BL21(DE3)                        | ( $\lambda$ DE3) F <sup>-</sup> ompT hsdS <sub>B</sub> (r <sub>B</sub> <sup>-</sup> m <sub>B</sub> <sup>-</sup> ) dcm gal                                                                                | Novagen                                                   |
| <b>Plasmids</b>                  |                                                                                                                                                                                                          |                                                           |
| pBluescript II SK(+)             | Cloning vector, Amp <sup>r</sup>                                                                                                                                                                         | (Alting-Mees and Short, 1989), (Alting-Mees et al., 1992) |
| pRK415                           | Broad host cloning vector, Tc <sup>r</sup>                                                                                                                                                               | (Keen et al., 1988)                                       |
| pET30(a+)                        | IPTG-inducible expression vector; Km <sup>r</sup>                                                                                                                                                        | Novagen                                                   |
| pET30(b+)                        | IPTG-inducible expression vector; Km <sup>r</sup>                                                                                                                                                        | Novagen                                                   |
| pRK6-1LuxI                       | pRK415 derivative, carrying full-length PCR amplified LuxI <sub>QS6-1</sub> under the control of the lac promoter of pRK415, Tc <sup>r</sup>                                                             | This study                                                |
| pET6-1LuxI                       | pET30(a+) derivative, carrying full-length luxI <sub>QS6-1</sub> under the T7 promoter, Km <sup>r</sup>                                                                                                  | This study                                                |
| pET10-1LuxI                      | pET30(a+) derivative, carrying full-length luxI <sub>QS10-1</sub> under the T7 promoter, Km <sup>r</sup>                                                                                                 | This study                                                |
| pET10-2LuxI                      | pET30(b+) derivative, carrying full-length luxI <sub>QS10-2</sub> under the T7 promoter, Km <sup>r</sup>                                                                                                 | This study                                                |

Table S2. Primers used to amplify *luxI* and *luxR* homologs.

| Name of primers                 | Sequences                |
|---------------------------------|--------------------------|
| <i>luxI</i> <sub>QS6-1</sub> F  | ATGCATCACCAGATTTTTACG    |
| <i>luxI</i> <sub>QS6-1</sub> R  | GGCTAGGCCGTTGCGTCC       |
| <i>luxI</i> <sub>QS10-1</sub> F | AAAGTTGTTACACATTCGCTCAGG |
| <i>luxI</i> <sub>QS10-1</sub> R | GCAAATCCGGCTGTACTCCCT    |
| <i>luxI</i> <sub>QS10-2</sub> F | GCCGATGATTCTGATCATCAACGC |
| <i>luxI</i> <sub>QS10-2</sub> R | TGTTTCTTTACGCGGCGATCTTT  |
